# Supplementary material for: Ethanol Conditioned Taste Aversion in High Drinking in the Dark Mice
Source: MDPI journal article supplement (doi:10.3390/brainsci9010002), 2019-01-01
Supplement: s1 [file s1]

**Supplemental Figure 1.** Intake across days of EtOH taste aversion conditioning varies as a function of genotype and dose. Panel a shows means  $\pm$  SEM for groups of 6-11 female mice, and Panel b for groups of 5-12 males. Compare with Figure 1 in the main text, which shows the same data for the sexes combined.

**Supplemental Figure 2.** Mean  $\pm$  SEM intake (Panel a) and BALs (Panel b) after 4 hr on Day 2 for groups of 23-24 mice per genotype and concentration, collapsed on sex.
